# Supplementary material for: opjMap: A Sensitive Mapper for Repetitive Structural Variations in Long Noisy Reads Based on Orthogonal Projection
Source: Research Square preprint supplement (doi:10.21203/rs.3.rs-7929852/v1), 2025-11-26
Supplement: Supplementary file 1 [file ae5ebad1af50775e026307ea.docx]

opjMap: A Sensitive Mapper for Repetitive Structural Variations in Long Noisy Reads Based on Orthogonal Projection

Xing-Guo Fan1, Xiao-Dan Zhang2*, Cheng-Song Hu1, Jie-Jie Zeng1, Shu-Rui Li1, Ze-Gang Wei2

1Institute of Information and Intelligent Engineering Applications, Wuhan Technology And Business University, Wuhan, Hubei, China

2Institute of Physics and Optoelectronics Technology, Baoji University of Arts and Sciences, Baoji, Shaanxi, China

*Corresponding author name and email address: Xiao-Dan Zhang - 20240101168@wtbu.edu.cn

**Supplementary file**

**Figures**

**Fig. S1**. The Accuracy and Sensitivity for Duplications Across Distinct Reference Regions Under Different Rates

**Fig. S2**. The Accuracy and Sensitivity for Duplications Within a Single Reference Region Under Different Rates

**Fig. S3**. Distribution of Inserted Repeat Fragment Lengths

**Supplementary Tables**

**Table S1**. Commands for generating PacBio and ONT datasets

| Error Rates (%) | Command line |
| --- | --- |
| 10 | pbsim3 --strategy wgs --genome chr1.fa --depth 10 \  --method qshmm --qshmm pbModel/QSHMM-RSII.model \  --length-mean 10000 --length-min 1000 \  --accuracy-mean 0.90 \  --prefix pacbio_10percent |
| 15 | pbsim3 --strategy wgs --genome chr1.fa --depth 10 \  --method errhmm --errhmm pbModel/ERRHMM-SEQUEL.model \  --length-mean 10000 --length-min 1000 \  --accuracy-mean 0.85 \  --prefix pacbio_15percent |
| 20 | pbsim3 --strategy wgs --genome chr1.fa --depth 10 \  --method qshmm --qshmm pbModel/QSHMM-ONT.model \  --length-mean 20000 --length-min 1000\  --accuracy-mean 0.80 --difference-ratio 39:24:36 \  --hp-del-bias 1 --prefix ont_20percent |
| 30 | pbsim3 --strategy wgs --genome chr1.fa --depth 10 \  --method qshmm --qshmm pbModel/QSHMM-ONT-HQ.model \  --length-mean 20000 --length-min 1000 \  --accuracy-mean 0.70 \  --prefix ont_30percent |

**Table S2**. Running Command Lines of Different Mapping Programs

| Programs | Running command lines |
| --- | --- |
| minimap2 | minimap2 -t 24 -a genome.fa sequence.fa > minimap2.sam |
| NGMLR | ngmlr -t 24 -r genome.fa -q sequence.fa -o ngmlr.sam |
| Winnownam2 | meryl count k=15 output merylDB genome.fa  meryl print greater-than distinct=0.9998 merylDB > repetitive_k15.txt  winnowmap -W repetitive_k15.txt -t 64 -ax map-pb genome.fa sequence.fa >win.sam |
| opjMap | opjMap -t 24 -a genome.fa sequence.fa -o opjmap.sam |

**Table S3**. Parameter Settings of BadReads Software for Generating Simulated Datasets.

| Error Rates | Command line |
| --- | --- |
| 15% | badread simulate --seed 20 --reference duplications.fa --quantity 1x --identity 85,90,2.5 --error_model pacbio2021 >simulated.fastq |

**Table S4**. Dataset Information for Interspersed Repeats under Different Error Rates

| Error rates (%) | Average length  (bp) | Min. length  (bp) | Max. length  (bp) | Number of reads |
| --- | --- | --- | --- | --- |
| 10 | 12390 | 10957 | 13622 | 3629 |
| 15 | 12130 | 10857 | 13337 | 3764 |
| 20 | 11881 | 10732 | 13130 | 3792 |
| 25 | 11772 | 10610 | 13010 | 3882 |
| 30 | 11746 | 10475 | 12893 | 3814 |

**Table S5**. Dataset Information for Interspersed Repeats under Different Lengths

| Length (bp) | Average length  (bp) | Min. length  (bp) | Max. length  (bp) | Number of reads |
| --- | --- | --- | --- | --- |
| 100 | 11298 | 10742 | 11660 | 3809 |
| 500 | 11658 | 10835 | 11657 | 3742 |
| 1000 | 12118 | 10714 | 13360 | 3792 |
| 2500 | 13392 | 10804 | 16085 | 3590 |
| 5000 | 15536 | 10899 | 20887 | 3233 |

**Table S6**. Command Lines for Mapping Duplications

| Programs | Running command lines |
| --- | --- |
| minimap2 | minimap2 -t 24 -a genome.fa sequence.fa > minimap2.sam |
| NGMLR | ngmlr -t 24 -r genome.fa -q sequence.fa -o ngml.sam |
| Winnownam2 | meryl count k=15 output merylDB chr1.fa  meryl print greater-than distinct=0.9998 merylDB > repetitive_k15.txt  winnowmap -W repetitive_k15.txt -t 24 -ax map-pb genome.fa sequence.fa --eqx --cs --secondary -P > win.sam |
| opjMap | opjMap -t 24 -a genome.fa sequence.fa -o opjMap.sam |

**Table S7**. Accuracy and Sensitivity for Duplications Across Distinct Reference Regions Under Different Lengths

| Length (bp) | opjMap | minimap2 | NGMLR | Winnowmap2 |
| --- | --- | --- | --- | --- |
| 100 | 11.7 / 11.7 | 9.55 / 9.55 | 0.08 / 0.08 | 0.27 / 0.27 |
| 500 | 83.11 / 83.11 | 80.24 / 80.24 | 49.93 / 49.91 | 19.29 / 18.96 |
| 1000 | 96.35 / 96.35 | 95.0 / 95.0 | 84.7 / 84.54 | 46.71 / 45.88 |
| 2500 | 99.8 / 99.8 | 99.44 / 99.44 | 91.51 / 91.46 | 83.01 / 81.14 |
| 5000 | 100.0 / 100.0 | 99.97 / 99.97 | 98.85 / 98.85 | 94.67 / 92.46 |

The format of each cell in the table is Accuracy (%) / Sensitivity (%)

**Table S8** Dataset Information for Duplications Within a Single Reference Region Under Different Error Rates

| Error rates (%) | Average length  (bp) | Min. length  (bp) | Max. length  (bp) | Number of reads |
| --- | --- | --- | --- | --- |
| 10 | 12335 | 10116 | 14672 | 3615 |
| 15 | 12046 | 9939 | 14205 | 3694 |
| 20 | 11829 | 9787 | 13981 | 3828 |
| 25 | 11727 | 9793 | 13913 | 3858 |
| 30 | 11711 | 9730 | 13810 | 3854 |

**Table S9** Dataset0rence Region Under Different Lengths

| Length (bp) | Average length  (bp) | Min. length  (bp) | Max. length  (bp) | Number of reads |
| --- | --- | --- | --- | --- |
| 100 | 11605 | 9239 | 14183 | 3760 |
| 500 | 11777 | 9532 | 14283 | 3765 |
| 1000 | 12082 | 9907 | 14312 | 3758 |
| 2500 | 12757 | 11299 | 14272 | 3584 |
| 5000 | 13998 | 13410 | 14362 | 3584 |

**Table S10**. Accuracy and Sensitivity for Duplications Within a Single Reference Region Under Different Lengths

| Length (bp) | opjMap | minimap2 | NGMLR | Winnowmap2 |
| --- | --- | --- | --- | --- |
| 100 | 43.58 / 43.58 | 6.46 / 6.46 | 0.32 / 0.32 | 0.43 / 0.42 |
| 500 | 95.35 / 95.35 | 73.06 / 73.06 | 77.0 / 76.78 | 20.39 / 20.02 |
| 1000 | 98.63 / 98.63 | 91.69 / 91.69 | 89.25 / 89.14 | 52.24 / 51.08 |
| 2500 | 99.78 / 99.78 | 99.14 / 99.14 | 94.56 / 94.4 | 86.2 / 84.01 |
| 5000 | 99.97 / 99.97 | 99.94 / 99.94 | 95.41 / 95.24 | 94.41 / 92.42 |

The format of each cell in the table is Accuracy (%) / Sensitivity (%)

**Table S11** Dataset information for duplication within a single reference region under different Lengths

| Length (bp) | Average length  (bp) | Min. length  (bp) | Max. length  (bp) | Number of reads |
| --- | --- | --- | --- | --- |
| 100 | 8953 | 4573 | 14240 | 4113 |
| 250 | 9794 | 5932 | 14180 | 4003 |
| 500 | 11032 | 8225 | 14167 | 3862 |
| 750 | 12348 | 10458 | 14362 | 3713 |
| 1000 | 13541 | 12464 | 14460 | 3574 |

**Table S12** Comparison of Detection Sensitivity for Segmental Duplications Across Different Thresholds (*n*)

| Methods | thresholds | | | |
| --- | --- | --- | --- | --- |
| 3 | 5 | 7 | 10 |
| opjMap | 99.78 | 99.3 | 98.74 | 92.31 |
| minimap2 | 99.55 | 98.55 | 96.92 | 69.7 |
| NGMLR | 97.62 | 96.75 | 95.08 | 84 |
| Winnowmap2 | 72.16 | 53.41 | 34.78 | 7.13 |

**Table S13**. The Accuracy and Sensitivity of Alignment Tools in Handling Repeats (*n* = 10)

| Length (bp) | opjMap | minimap2 | NGMLR | Winnowmap2 |
| --- | --- | --- | --- | --- |
| 100 | 0.44 / 0.44 | 0.19 / 0.19 | 0.0 / 0.0 | 0.2 / 0.19 |
| 250 | 19.06 / 19.06 | 0.95 / 0.95 | 0.0 / 0.0 | 0.03 / 0.02 |
| 500 | 74.41 / 74.39 | 15.85 / 15.85 | 21.74 / 21.65 | 0.3 / 0.28 |
| 750 | 89.98 / 89.98 | 47.19 / 47.19 | 69.89 / 69.75 | 1.61 / 1.54 |
| 1000 | 92.31 / 92.31 | 69.7 / 69.7 | 84.63 / 84.0 | 7.45 / 7.13 |

The format of each cell in the table is Accuracy (%) / Sensitivity (%)
